# Supplementary material for: Synthesis and magnetic properties of new tellurate compounds Na4MTeO6 (M = Co and Ni) with a ferromagnetic spin-chain structure
Source: Royal Society of Chemistry journal article supplement (doi:10.1039/c6dt04750e), 2017-01-01
Supplement: c6dt04750e1.pdf [file c6dt04750e1.pdf]

Supporting Information

**Synthesis and magnetic properties of new tellurate compounds**

**Na<sub>4</sub>MTeO<sub>6</sub> (M = Co and Ni) with a ferromagnetic spin chain structure**

Zhangzhen He<sup>\*,†</sup>, Wenbin Guo<sup>†</sup>, Meiyan Cui<sup>†</sup>, and Yingying Tang<sup>†</sup>

<sup>†</sup>State Key Laboratory of Structural Chemistry, Fujian Institute of Research on the Structure of Matter, Chinese Academy of Sciences, Fuzhou 350002, P. R. China

\*E-mail: [hezz@fjirsm.ac.cn](mailto:hezz@fjirsm.ac.cn) or [hcz1988@hotmail.com](mailto:hcz1988@hotmail.com)

**Figure S1.** The thermal behaviors of of Na<sub>4</sub>MTeO<sub>6</sub> (M = Co, Ni).

**Figure S2.** Simulated and experimental powder X-ray (Cu K $\alpha$ ) diffraction patterns of Na<sub>4</sub>MTeO<sub>6</sub> (M = Co, Ni).

**Figure S3.** The oxygen-coordination environments for (a) Co and (b) Te atoms of Na<sub>4</sub>CoTeO<sub>6</sub>, respectively.

**Figure S4.** The oxygen-coordination environments for (a) Ni and (b) Te atoms of Na<sub>4</sub>NiTeO<sub>6</sub>, respectively.

**Table S1.** Atomic coordinates ( $\times 10^4$ ) and equivalent isotropic displacement parameters ( $\text{\AA}^2 \times 10^3$ ) for Na<sub>4</sub>CoTeO<sub>6</sub> and Na<sub>4</sub>NiTeO<sub>6</sub>.

**Table S2.** Bond lengths [ $\text{\AA}$ ] and angles [deg] for Na<sub>4</sub>CoTeO<sub>6</sub>.

**Table S3.** Bond lengths [ $\text{\AA}$ ] and angles [deg] for Na<sub>4</sub>NiTeO<sub>6</sub>.

**Table S4.** Anisotropic displacement parameters ( $\text{\AA}^2 \times 10^3$ ) for for Na<sub>4</sub>CoTeO<sub>6</sub> and Na<sub>4</sub>NiTeO<sub>6</sub>.

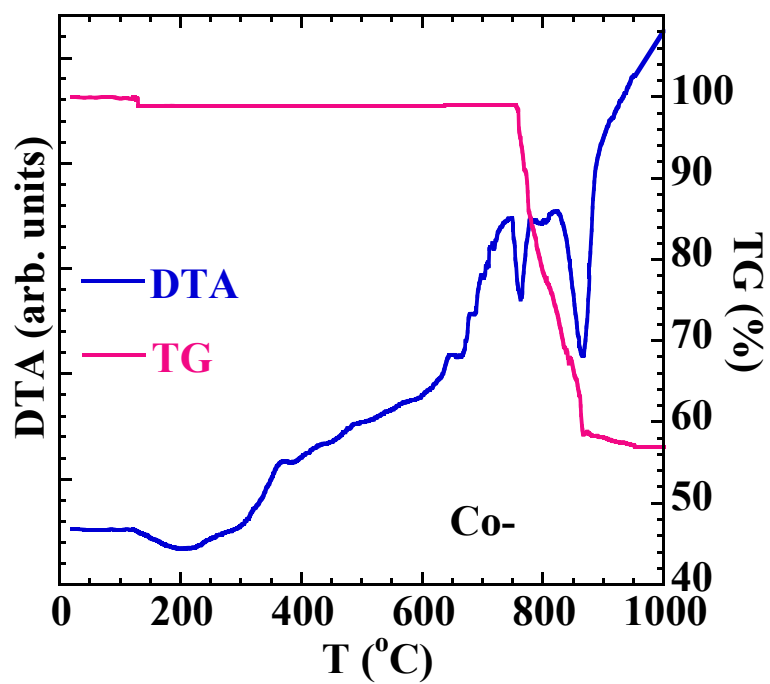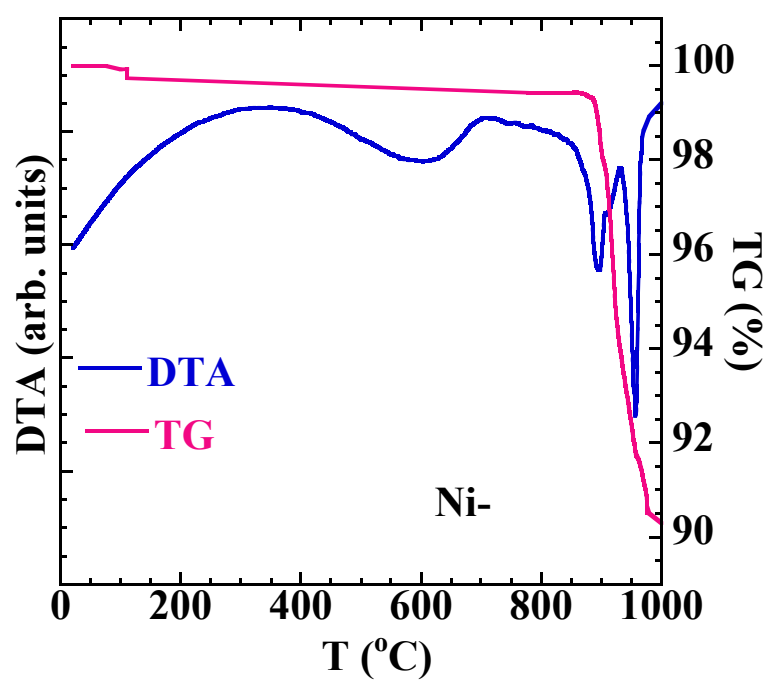

Figure S1. The thermal behaviors of  $\text{Na}_4\text{MTeO}_6$  ( $\text{M} = \text{Co}, \text{Ni}$ ).

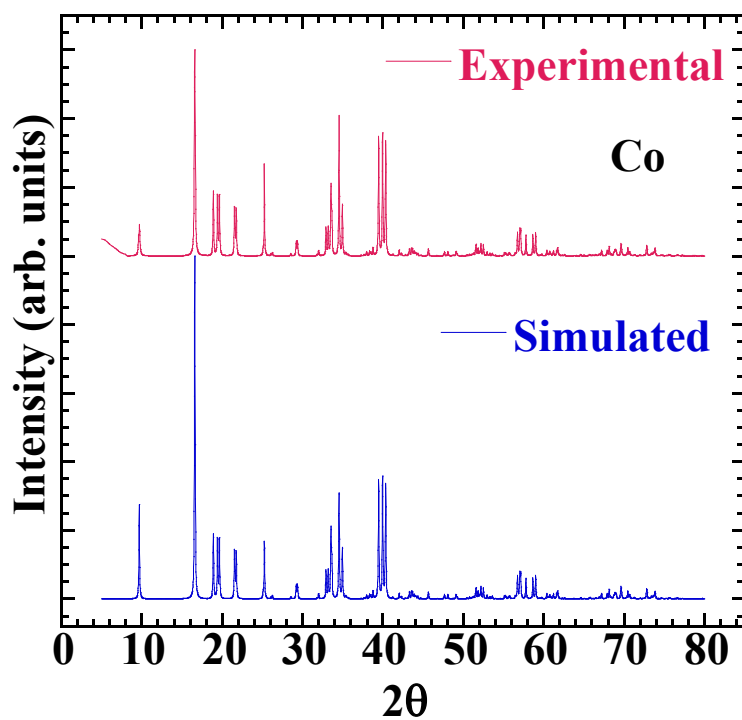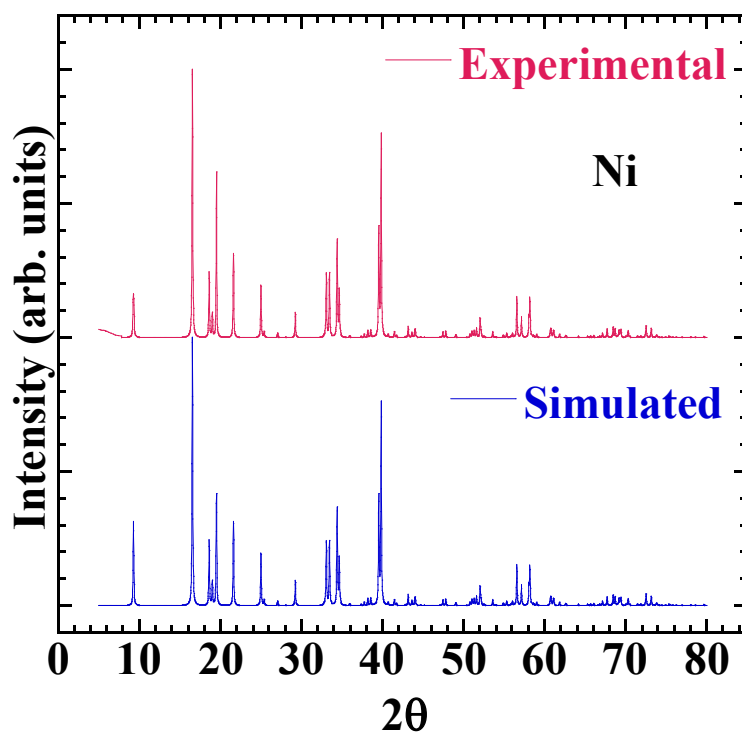

**Figure S2.** Simulated (blue line) and experimental (red line) powder X-ray (Cu K $\alpha$ ) diffraction patterns of Na<sub>4</sub>MTeO<sub>6</sub> (M = Co, Ni).

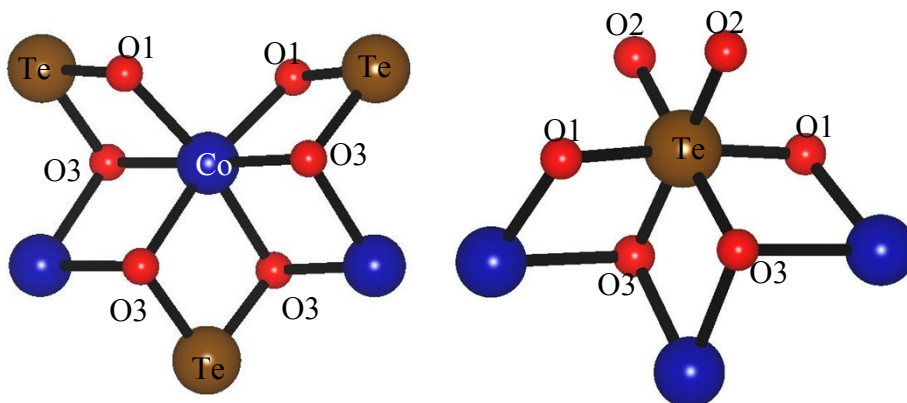

**Figure S3.** The oxygen-coordination environments for (a) Co and (b) Te atoms of  $\text{Na}_4\text{CoTeO}_6$ , respectively.

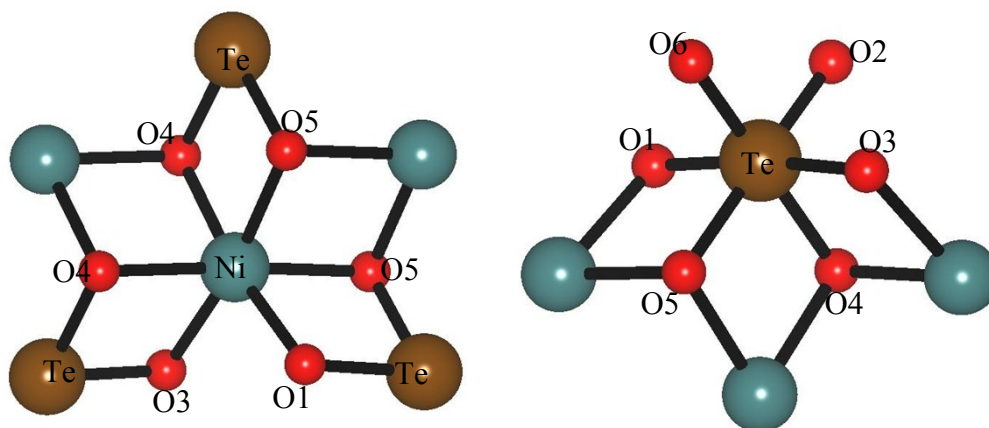

**Figure S4.** The oxygen-coordination environments for (a) Ni and (b) Te atoms of  $\text{Na}_4\text{NiTeO}_6$ , respectively.

**Table S1.** Atomic coordinates ( $\times 10^4$ ) and equivalent isotropic displacement parameters ( $\text{\AA}^2 \times 10^3$ ) for  $\text{Na}_4\text{CoTeO}_6$  and  $\text{Na}_4\text{NiTeO}_6$ .  $U(\text{eq})$  is defined as one third of the trace of the orthogonalized  $U_{ij}$  tensor.

| atom  | x       | y        | z       | $U(\text{eq})$ |
|-------|---------|----------|---------|----------------|
| Te(1) | 5000    | 2566(1)  | 7500    | 6(1)           |
| Co(1) | 5000    | 5853(1)  | 7500    | 8(1)           |
| O(1)  | 2988(5) | 4093(2)  | 5308(5) | 8(1)           |
| O(2)  | 6986(5) | 2679(2)  | 5231(5) | 8(1)           |
| O(3)  | 2816(5) | 1184(3)  | 5415(5) | 8(1)           |
| Na(1) | 5000    | 815(2)   | 2500    | 5(1)           |
| Na(2) | 0       | 5721(2)  | 2500    | 12(1)          |
| Na(3) | 0       | 2577(2)  | 2500    | 18(1)          |
| Na(4) | 0       | 820(2)   | 7500    | 19(1)          |
| Te(1) | 2481(1) | 9927(1)  | 2431(1) | 3(1)           |
| Ni(1) | 2503(1) | 10029(1) | -826(1) | 5(1)           |
| O(1)  | -861(3) | 11981(3) | 1987(2) | 6(1)           |
| O(2)  | 3473(3) | 12087(3) | 3426(2) | 7(1)           |
| O(3)  | 5813(3) | 7872(3)  | 2668(2) | 6(1)           |
| O(4)  | 3727(3) | 11937(3) | 563(2)  | 6(1)           |
| O(5)  | 1259(3) | 8029(3)  | 1214(2) | 6(1)           |
| O(6)  | 1461(3) | 7745(3)  | 4183(2) | 7(1)           |
| Na(1) | 0       | 5000     | 0       | 11(1)          |
| Na(2) | 5070(2) | 4930(2)  | 1570(1) | 10(1)          |
| Na(3) | 9806(2) | 4934(2)  | 3307(1) | 11(1)          |
| Na(4) | 5000    | 5000     | 5000    | 24(1)          |
| Na(5) | 2518(1) | 39(1)    | 5803(1) | 6(1)           |

**Table S2.** Bond lengths [ $\text{\AA}$ ] and angles [deg] for  $\text{Na}_4\text{CoTeO}_6$ .

|                       |            |                       |            |
|-----------------------|------------|-----------------------|------------|
| Te(1)-O(3)            | 1.906(3)   | Te(1)-O(2)#1          | 1.941(3)   |
| Te(1)-O(3)#1          | 1.906(3)   | Te(1)-O(1)#1          | 1.988(3)   |
| Te(1)-O(2)            | 1.941(3)   | Te(1)-O(1)            | 1.988(3)   |
| Co(1)-O(2)#6          | 2.084(3)   | Co(1)-O(1)#1          | 2.155(3)   |
| Co(1)-O(2)#5          | 2.084(3)   | Co(1)-O(1)#6          | 2.203(3)   |
| Co(1)-O(1)            | 2.155(3)   | Co(1)-O(1)#5          | 2.203(3)   |
| Na(1)-O(2)#10         | 2.354(3)   | Na(1)-O(3)#3          | 2.351(3)   |
| Na(1)-O(3)#11         | 2.351(3)   | Na(1)-O(3)#10         | 2.354(3)   |
| O(2)-Na(1)            | 2.354(3)   | O(3)-Na(1)            | 2.354(3)   |
| Na(2)-O(2)#5          | 2.319(3)   | Na(2)-O(1)#7          | 2.390(3)   |
| Na(2)-O(2)#14         | 2.319(3)   | Na(2)-O(1)#16         | 2.431(3)   |
| Na(2)-O(1)#15         | 2.390(3)   | O(1)-Na(2)            | 2.431(3)   |
| Na(3)-O(3)#16         | 2.273(3)   | Na(3)-O(2)#10         | 2.625(3)   |
| Na(3)-O(1)#16         | 2.365(3)   | Na(3)-O(2)#18         | 2.625(3)   |
| O(3)-Na(3)            | 2.273(3)   | O(1)-Na(3)            | 2.365(3)   |
| Na(4)-O(3)#19         | 2.281(3)   | Na(4)-O(3)#9          | 2.655(3)   |
| Na(4)-O(2)#1          | 2.489(3)   | Na(4)-O(3)#20         | 2.655(3)   |
| Na(4)-O(2)#18         | 2.489(3)   | O(3)-Na(4)            | 2.281(3)   |
| O(3)-Te(1)-O(3)#1     | 92.65(16)  | O(2)-Te(1)-O(1)#1     | 90.44(12)  |
| O(3)-Te(1)-O(2)       | 93.12(12)  | O(2)#1-Te(1)-O(1)#1   | 84.89(12)  |
| O(3)#1-Te(1)-O(2)     | 91.28(12)  | O(3)-Te(1)-O(1)       | 90.83(12)  |
| O(3)-Te(1)-O(2)#1     | 91.28(12)  | O(3)#1-Te(1)-O(1)     | 174.96(9)  |
| O(3)#1-Te(1)-O(2)#1   | 93.12(12)  | O(2)-Te(1)-O(1)       | 84.89(12)  |
| O(2)-Te(1)-O(2)#1     | 173.62(14) | O(2)#1-Te(1)-O(1)     | 90.44(12)  |
| O(3)-Te(1)-O(1)#1     | 174.96(9)  | O(1)#1-Te(1)-O(1)     | 85.93(15)  |
| O(3)#1-Te(1)-O(1)#1   | 90.83(12)  | O(2)#5-Co(1)-O(1)#6   | 101.81(11) |
| O(2)#6-Co(1)-O(2)#5   | 95.76(14)  | O(1)-Co(1)-O(1)#6     | 96.09(10)  |
| O(2)#6-Co(1)-O(1)     | 169.07(10) | O(1)#1-Co(1)-O(1)#6   | 85.98(11)  |
| O(2)#5-Co(1)-O(1)     | 93.52(11)  | O(2)#6-Co(1)-O(1)#5   | 101.81(11) |
| O(2)#6-Co(1)-O(1)#1   | 93.52(11)  | O(2)#5-Co(1)-O(1)#5   | 76.37(12)  |
| O(2)#5-Co(1)-O(1)#1   | 169.07(10) | O(1)-Co(1)-O(1)#5     | 85.98(11)  |
| O(1)-Co(1)-O(1)#1     | 77.89(14)  | O(1)#1-Co(1)-O(1)#5   | 96.09(10)  |
| O(2)#6-Co(1)-O(1)#6   | 76.37(12)  | O(1)#6-Co(1)-O(1)#5   | 177.34(12) |
| O(2)-Na(1)-O(2)#10    | 82.08(14)  | O(3)#11-Na(1)-O(3)    | 98.01(11)  |
| O(2)-Na(1)-O(3)#11    | 169.61(9)  | O(3)#3-Na(1)-O(3)     | 95.88(10)  |
| O(2)#10-Na(1)-O(3)#11 | 103.78(10) | O(2)-Na(1)-O(3)#10    | 94.05(11)  |
| O(2)-Na(1)-O(3)#3     | 103.78(10) | O(2)#10-Na(1)-O(3)#10 | 72.79(11)  |
| O(2)#10-Na(1)-O(3)#3  | 169.61(9)  | O(3)#11-Na(1)-O(3)#10 | 95.88(10)  |
| O(3)#11-Na(1)-O(3)#3  | 71.81(14)  | O(3)#3-Na(1)-O(3)#10  | 98.01(11)  |
| O(2)-Na(1)-O(3)       | 72.79(11)  | O(3)-Na(1)-O(3)#10    | 162.83(15) |
| O(2)#10-Na(1)-O(3)    | 94.05(11)  | O(2)#14-Na(2)-O(1)#16 | 81.07(10)  |
| O(2)#5-Na(2)-O(2)#14  | 97.85(15)  | O(1)#15-Na(2)-O(1)#16 | 101.00(10) |

|                       |            |                       |            |
|-----------------------|------------|-----------------------|------------|
| O(2)#5-Na(2)-O(1)#15  | 72.60(11)  | O(1)#7-Na(2)-O(1)#16  | 84.48(11)  |
| O(2)#14-Na(2)-O(1)#15 | 101.63(11) | O(2)#5-Na(2)-O(1)     | 81.07(10)  |
| O(2)#5-Na(2)-O(1)#7   | 101.63(11) | O(2)#14-Na(2)-O(1)    | 173.23(9)  |
| O(2)#14-Na(2)-O(1)#7  | 72.60(11)  | O(1)#15-Na(2)-O(1)    | 84.48(11)  |
| O(1)#15-Na(2)-O(1)#7  | 171.49(14) | O(1)#7-Na(2)-O(1)     | 101.00(10) |
| O(2)#5-Na(2)-O(1)#16  | 173.23(9)  | O(1)#16-Na(2)-O(1)    | 100.77(14) |
| O(3)#16-Na(3)-O(3)    | 108.59(16) | O(1)-Na(3)-O(2)#10    | 83.48(10)  |
| O(3)#16-Na(3)-O(1)    | 176.32(8)  | O(1)#16-Na(3)-O(2)#10 | 93.91(11)  |
| O(3)-Na(3)-O(1)       | 73.43(11)  | O(3)#16-Na(3)-O(2)#18 | 89.07(10)  |
| O(3)#16-Na(3)-O(1)#16 | 73.43(11)  | O(3)-Na(3)-O(2)#18    | 93.42(10)  |
| O(3)-Na(3)-O(1)#16    | 176.32(8)  | O(1)-Na(3)-O(2)#18    | 93.91(11)  |
| O(1)-Na(3)-O(1)#16    | 104.73(15) | O(1)#16-Na(3)-O(2)#18 | 83.48(10)  |
| O(3)#16-Na(3)-O(2)#10 | 93.42(10)  | O(2)#10-Na(3)-O(2)#18 | 175.75(13) |
| O(3)-Na(3)-O(2)#10    | 89.07(10)  | O(3)#19-Na(4)-O(3)#9  | 91.68(11)  |
| O(3)-Na(4)-O(3)#19    | 162.51(17) | O(2)#1-Na(4)-O(3)#9   | 171.19(8)  |
| O(3)-Na(4)-O(2)#1     | 70.28(11)  | O(2)#18-Na(4)-O(3)#9  | 91.99(10)  |
| O(3)#19-Na(4)-O(2)#1  | 96.95(11)  | O(3)-Na(4)-O(3)#20    | 91.68(11)  |
| O(3)-Na(4)-O(2)#18    | 96.95(11)  | O(3)#19-Na(4)-O(3)#20 | 100.90(10) |
| O(3)#19-Na(4)-O(2)#18 | 70.28(11)  | O(2)#1-Na(4)-O(3)#20  | 91.99(10)  |
| O(2)#1-Na(4)-O(2)#18  | 89.27(14)  | O(2)#18-Na(4)-O(3)#20 | 171.19(8)  |
| O(3)-Na(4)-O(3)#9     | 100.90(10) | O(3)#9-Na(4)-O(3)#20  | 88.09(13)  |

Symmetry transformations used to generate equivalent atoms:

|                       |                        |                      |
|-----------------------|------------------------|----------------------|
| #1 $-x+1, y, -z+3/2$  | #2 $x, y, z+1$         | #3 $-x+1, -y, -z+1$  |
| #4 $x+1, y, z+1$      | #5 $-x+1, -y+1, -z+1$  | #6 $x, -y+1, z+1/2$  |
| #7 $-x, -y+1, -z+1$   | #8 $x+1, y, z$         | #9 $-x, -y, -z+1$    |
| #10 $-x+1, y, -z+1/2$ | #11 $x, -y, z-1/2$     | #12 $-x+1, -y, -z$   |
| #13 $x, y, z-1$       | #14 $x-1, -y+1, z-1/2$ | #15 $x, -y+1, z-1/2$ |
| #16 $-x, y, -z+1/2$   | #17 $-x, -y+1, -z$     | #18 $x-1, y, z$      |
| #19 $-x, y, -z+3/2$   | #20 $x, -y, z+1/2$     | #21 $-x, -y, -z+2$   |

**Table S3.** Bond lengths [Å] and angles [deg] for Na<sub>4</sub>NiTeO<sub>6</sub>.

|                       |            |                       |            |
|-----------------------|------------|-----------------------|------------|
| Te(1)-O(2)            | 1.8962(15) | Te(1)-O(1)            | 1.9550(16) |
| Te(1)-O(6)            | 1.9089(16) | Te(1)-O(5)            | 1.9813(16) |
| Te(1)-O(3)            | 1.9506(16) | Te(1)-O(4)            | 1.9991(16) |
| Ni(1)-O(1)#1          | 2.0989(16) | Ni(1)-O(5)            | 2.1194(17) |
| Ni(1)-O(3)#2          | 2.1121(16) | Ni(1)-O(5)#1          | 2.1237(17) |
| Ni(1)-O(4)            | 2.1124(16) | Ni(1)-O(4)#2          | 2.1321(17) |
| Na(1)-O(1)#1          | 2.2609(16) | Na(1)-O(4)#1          | 2.3807(16) |
| Na(1)-O(1)#10         | 2.2609(16) | Na(1)-O(5)#11         | 2.5142(16) |
| Na(1)-O(4)#10         | 2.3807(16) | O(5)-Na(1)            | 2.5142(16) |
| Na(2)-O(2)#10         | 2.2944(18) | Na(2)-O(4)#2          | 2.4476(19) |
| Na(2)-O(4)#10         | 2.3878(18) | Na(2)-O(1)#12         | 2.4877(18) |
| O(5)-Na(2)            | 2.4296(19) | O(3)-Na(2)            | 2.3012(18) |
| Na(3)-O(6)#13         | 2.3029(18) | Na(3)-O(5)#13         | 2.4679(19) |
| Na(3)-O(2)#12         | 2.3194(18) | Na(3)-O(6)#4          | 2.595(2)   |
| Na(3)-O(1)#12         | 2.4422(18) | O(3)-Na(3)            | 2.4564(19) |
| Na(4)-O(6)#4          | 2.2384(16) | Na(4)-O(2)#10         | 2.7559(16) |
| Na(4)-O(3)#4          | 2.4343(17) | Na(4)-O(2)#15         | 2.7559(16) |
| O(3)-Na(4)            | 2.4343(17) | O(6)-Na(4)            | 2.2384(16) |
| Na(5)-O(6)#3          | 2.3057(18) | Na(5)-O(1)#3          | 2.3424(19) |
| Na(5)-O(2)#4          | 2.3074(18) | Na(5)-O(3)#4          | 2.3956(18) |
| Na(5)-O(2)#10         | 2.3296(19) | Na(5)-O(6)#10         | 2.4191(18) |
| O(2)-Te(1)-O(6)       | 92.87(7)   | O(3)-Te(1)-O(5)       | 91.24(7)   |
| O(2)-Te(1)-O(3)       | 93.30(7)   | O(1)-Te(1)-O(5)       | 84.32(7)   |
| O(6)-Te(1)-O(3)       | 91.09(7)   | O(2)-Te(1)-O(4)       | 90.42(7)   |
| O(2)-Te(1)-O(1)       | 90.80(7)   | O(6)-Te(1)-O(4)       | 174.84(6)  |
| O(6)-Te(1)-O(1)       | 92.86(7)   | O(3)-Te(1)-O(4)       | 84.75(7)   |
| O(3)-Te(1)-O(1)       | 174.16(6)  | O(1)-Te(1)-O(4)       | 91.06(7)   |
| O(2)-Te(1)-O(5)       | 173.28(6)  | O(5)-Te(1)-O(4)       | 85.07(7)   |
| O(6)-Te(1)-O(5)       | 91.99(7)   | O(3)#2-Ni(1)-O(5)#1   | 100.26(6)  |
| O(1)#1-Ni(1)-O(3)#2   | 94.55(7)   | O(4)-Ni(1)-O(5)#1     | 97.69(6)   |
| O(1)#1-Ni(1)-O(4)     | 171.45(6)  | O(5)-Ni(1)-O(5)#1     | 85.12(6)   |
| O(3)#2-Ni(1)-O(4)     | 93.24(7)   | O(1)#1-Ni(1)-O(4)#2   | 99.99(6)   |
| O(1)#1-Ni(1)-O(5)     | 93.50(7)   | O(3)#2-Ni(1)-O(4)#2   | 77.70(6)   |
| O(3)#2-Ni(1)-O(5)     | 171.14(6)  | O(4)-Ni(1)-O(4)#2     | 85.09(6)   |
| O(4)-Ni(1)-O(5)       | 78.97(7)   | O(5)-Ni(1)-O(4)#2     | 97.24(6)   |
| O(1)#1-Ni(1)-O(5)#1   | 77.47(6)   | O(5)#1-Ni(1)-O(4)#2   | 176.67(5)  |
| O(1)#1-Na(1)-O(1)#10  | 180.00(6)  | O(4)#10-Na(1)-O(5)    | 98.72(5)   |
| O(1)#1-Na(1)-O(4)#10  | 105.16(6)  | O(4)#1-Na(1)-O(5)     | 81.28(5)   |
| O(1)#10-Na(1)-O(4)#10 | 74.84(6)   | O(1)#1-Na(1)-O(5)#11  | 100.10(6)  |
| O(1)#1-Na(1)-O(4)#1   | 74.84(6)   | O(1)#10-Na(1)-O(5)#11 | 79.90(6)   |
| O(1)#10-Na(1)-O(4)#1  | 105.16(6)  | O(4)#10-Na(1)-O(5)#11 | 81.28(5)   |
| O(4)#10-Na(1)-O(4)#1  | 180.00(5)  | O(4)#1-Na(1)-O(5)#11  | 98.72(5)   |



|                       |           |                       |           |
|-----------------------|-----------|-----------------------|-----------|
| O(1)#1-Na(1)-O(5)     | 79.90(6)  | O(5)-Na(1)-O(5)#11    | 180.00(5) |
| O(1)#10-Na(1)-O(5)    | 100.10(6) | O(3)-Na(2)-O(4)#2     | 80.51(6)  |
| O(2)#10-Na(2)-O(3)    | 102.56(7) | O(4)#10-Na(2)-O(4)#2  | 103.86(6) |
| O(2)#10-Na(2)-O(4)#10 | 72.37(6)  | O(5)-Na(2)-O(4)#2     | 81.70(6)  |
| O(3)-Na(2)-O(4)#10    | 171.99(6) | O(2)#10-Na(2)-O(1)#12 | 88.77(6)  |
| O(2)#10-Na(2)-O(5)    | 93.17(6)  | O(3)-Na(2)-O(1)#12    | 103.03(6) |
| O(3)-Na(2)-O(5)       | 72.83(6)  | O(4)#10-Na(2)-O(1)#12 | 83.30(6)  |
| O(4)#10-Na(2)-O(5)    | 100.93(6) | O(5)-Na(2)-O(1)#12    | 175.72(6) |
| O(2)#10-Na(2)-O(4)#2  | 173.03(6) | O(4)#2-Na(2)-O(1)#12  | 96.67(6)  |
| O(6)#13-Na(3)-O(2)#12 | 98.06(7)  | O(1)#12-Na(3)-O(5)#13 | 96.53(6)  |
| O(6)#13-Na(3)-O(1)#12 | 163.63(6) | O(3)-Na(3)-O(5)#13    | 82.63(6)  |
| O(2)#12-Na(3)-O(1)#12 | 70.28(6)  | O(6)#13-Na(3)-O(6)#4  | 96.46(6)  |
| O(6)#13-Na(3)-O(3)    | 90.05(6)  | O(2)#12-Na(3)-O(6)#4  | 90.99(6)  |
| O(2)#12-Na(3)-O(3)    | 168.07(7) | O(1)#12-Na(3)-O(6)#4  | 95.21(6)  |
| O(1)#12-Na(3)-O(3)    | 99.92(6)  | O(3)-Na(3)-O(6)#4     | 96.81(6)  |
| O(6)#13-Na(3)-O(5)#13 | 71.73(7)  | O(5)#13-Na(3)-O(6)#4  | 168.17(6) |
| O(2)#12-Na(3)-O(5)#13 | 91.57(6)  | O(6)#4-Na(4)-O(2)#10  | 91.97(6)  |
| O(6)-Na(4)-O(6)#4     | 180.00(8) | O(3)-Na(4)-O(2)#10    | 87.16(6)  |
| O(6)-Na(4)-O(3)       | 72.12(6)  | O(3)#4-Na(4)-O(2)#10  | 92.84(6)  |
| O(6)#4-Na(4)-O(3)     | 107.88(6) | O(6)-Na(4)-O(2)#15    | 91.97(6)  |
| O(6)-Na(4)-O(3)#4     | 107.88(6) | O(6)#4-Na(4)-O(2)#15  | 88.03(6)  |
| O(6)#4-Na(4)-O(3)#4   | 72.12(6)  | O(3)-Na(4)-O(2)#15    | 92.84(6)  |
| O(3)-Na(4)-O(3)#4     | 180.0     | O(3)#4-Na(4)-O(2)#15  | 87.16(6)  |
| O(6)-Na(4)-O(2)#10    | 88.03(6)  | O(2)#10-Na(4)-O(2)#15 | 180.00(5) |
| O(6)#3-Na(5)-O(2)#4   | 160.80(6) | O(2)#10-Na(5)-O(3)#4  | 105.70(7) |
| O(6)#3-Na(5)-O(2)#10  | 98.46(6)  | O(1)#3-Na(5)-O(3)#4   | 81.52(7)  |
| O(2)#4-Na(5)-O(2)#10  | 96.65(6)  | O(6)#3-Na(5)-O(6)#10  | 96.52(6)  |
| O(6)#3-Na(5)-O(1)#3   | 74.07(6)  | O(2)#4-Na(5)-O(6)#10  | 99.56(6)  |
| O(2)#4-Na(5)-O(1)#3   | 92.10(6)  | O(2)#10-Na(5)-O(6)#10 | 70.96(6)  |
| O(2)#10-Na(5)-O(1)#3  | 169.98(7) | O(1)#3-Na(5)-O(6)#10  | 102.82(7) |
| O(6)#3-Na(5)-O(3)#4   | 91.51(6)  | O(3)#4-Na(5)-O(6)#10  | 171.66(6) |
| O(2)#4-Na(5)-O(3)#4   | 72.98(6)  |                       |           |

Symmetry transformations used to generate equivalent atoms:

|                   |                  |                    |
|-------------------|------------------|--------------------|
| #1 -x,-y+2,-z     | #2 -x+1,-y+2,-z  | #3 -x,-y+1,-z+1    |
| #4 -x+1,-y+1,-z+1 | #5 x,y+1,z       | #6 -x+1,-y+1,-z    |
| #7 x,y+1,z-1      | #8 x-1,y+1,z     | #9 x-1,y,z         |
| #10 x,y-1,z       | #11 -x,-y+1,-z   | #12 x+1,y-1,z      |
| #13 x+1,y,z       | #14 -x+1,-y,-z+1 | #15 -x+1,-y+2,-z+1 |
| #16 -x,-y,-z+1    |                  |                    |

**Table S4.** Anisotropic displacement parameters ( $\text{\AA}^2 \times 10^3$ ) for for  $\text{Na}_4\text{CoTeO}_6$  and  $\text{Na}_4\text{NiTeO}_6$ . The anisotropic displacement factor exponent takes the form:  $-2 \pi^2 [ h^2 a^{*2} U11 + \dots + 2 h k a^* b^* U12 ]$ .

| atom  | U11   | U22   | U33   | U23   | U13   | U12   |
|-------|-------|-------|-------|-------|-------|-------|
| Te(1) | 5(1)  | 8(1)  | 4(1)  | 0     | 1(1)  | 0     |
| Co(1) | 8(1)  | 9(1)  | 6(1)  | 0     | 2(1)  | 0     |
| O(1)  | 6(1)  | 11(1) | 6(1)  | 1(1)  | 2(1)  | 1(1)  |
| O(2)  | 6(1)  | 13(1) | 7(1)  | 0(1)  | 4(1)  | 0(1)  |
| O(3)  | 7(1)  | 11(1) | 6(1)  | -4(1) | 2(1)  | -2(1) |
| Na(1) | 6(1)  | 7(1)  | 3(1)  | 0     | 3(1)  | 0     |
| Na(2) | 10(1) | 15(1) | 11(1) | 0     | 5(1)  | 0     |
| Na(3) | 15(1) | 16(1) | 16(1) | 0     | -4(1) | 0     |
| Na(4) | 16(1) | 24(2) | 21(1) | 0     | 11(1) | 0     |
| Te(1) | 3(1)  | 2(1)  | 4(1)  | -1(1) | 0(1)  | 0(1)  |
| Ni(1) | 5(1)  | 5(1)  | 6(1)  | -2(1) | 0(1)  | -1(1) |
| O(1)  | 4(1)  | 5(1)  | 8(1)  | -3(1) | 0(1)  | 1(1)  |
| O(2)  | 9(1)  | 6(1)  | 8(1)  | -4(1) | 0(1)  | -2(1) |
| O(3)  | 5(1)  | 5(1)  | 8(1)  | -1(1) | -1(1) | 2(1)  |
| O(4)  | 7(1)  | 5(1)  | 4(1)  | -1(1) | 1(1)  | -2(1) |
| O(5)  | 6(1)  | 6(1)  | 7(1)  | -3(1) | 0(1)  | -1(1) |
| O(6)  | 9(1)  | 5(1)  | 6(1)  | 0(1)  | 1(1)  | -1(1) |
| Na(1) | 11(1) | 8(1)  | 11(1) | 2(1)  | 1(1)  | 1(1)  |
| Na(2) | 11(1) | 7(1)  | 11(1) | -3(1) | 0(1)  | -2(1) |
| Na(3) | 11(1) | 9(1)  | 15(1) | -5(1) | -1(1) | -1(1) |
| Na(4) | 13(1) | 23(1) | 21(1) | 12(1) | 4(1)  | 10(1) |
| Na(5) | 5(1)  | 8(1)  | 6(1)  | -1(1) | 0(1)  | 0(1)  |
